# Supplementary material
Source: PubMed Central journal article supplement (PMC3763889)
Supplement: tvst-12-0032-s01.pdf [file tvst-12-0032-s01.pdf]

## Supplemental Information

From University of Auckland

### RHO: c.133T>C, p.Phe45Leu

Primer sequences as follows:

RHO\_c.133F: 5'-TTCTCCAATGCGACGGGTGTGG-3' (Own design- PrimerBLAST on NCBI)

RHO\_c.133R: 5'-TGGACGGTGACGTAGAGCGTGA-3' (Own design- PrimerBLAST on NCBI)

Used FastStart Taq enzyme kit from Roche, with 3.5mM final concentration of MgCl<sub>2</sub>.

PCR cycle as follows:

|                               | degC | time   |
|-------------------------------|------|--------|
| <b>initial denaturation</b>   | 96   | 5min   |
| <b>30x -<br/>denaturation</b> | 94   | 30secs |
| <b>-annealing</b>             | 63   | 1min   |
| <b>-extension</b>             | 72   | 1min   |
| <b>final extension</b>        | 72   | 10min  |

### CNGA3: c.1580T>G, p.Leu527Arg

Primer sequences as follows:

CNGA3\_1580F: 5'-GAGCCTCCCAGACAAGCTGAAG-3' (Own design- PrimerBLAST on NCBI)

CNGA3\_1580R: 5'-AGTAGCCAATGCTGCGGATGTT-3' (Own design- PrimerBLAST on NCBI)

Used FastStart Taq enzyme kit from Roche, with 3.5mM final concentration of MgCl<sub>2</sub>.

PCR cycle as follows:

|                               | degC | time   |
|-------------------------------|------|--------|
| <b>initial denaturation</b>   | 96   | 5min   |
| <b>30x -<br/>denaturation</b> | 94   | 30secs |
| <b>-annealing</b>             | 57   | 1min   |
| <b>-extension</b>             | 72   | 1min   |
| <b>final extension</b>        | 72   | 10min  |

Following column purification with HighPure PCR purification kit (Roche Diagnostic, Mannheim, Germany), the product was sequenced directly according to protocols accompanying the ABI *BigDye*

terminator kit v3.1 (Applied Biosystems Inc, Foster City, Ca, USA). Bidirectional sequencing of amplicons was undertaken on an ABI 3700 prism genetic analyzer (Applied Biosystems Inc, Foster City, Ca, USA).

### From University of Tuebingen

PCR fragments were subjected to a clean-up protocol (ExoSAP-IT; GE Healthcare, Freiburg, Germany) and then to direct DNA sequencing with dye terminator chemistry (BigDye Terminator ver. 1.1; Applied Biosystems [ABI], Darmstadt, Germany). All sequences were run on a capillary sequencer (ABI 3100; ABI) and analyzed with proprietary sequence trace analysis (Sequence Analysis, ver. 5.1; ABI) or sequence trace alignment software (SeqMan; DNASTAR, Madison, WI).

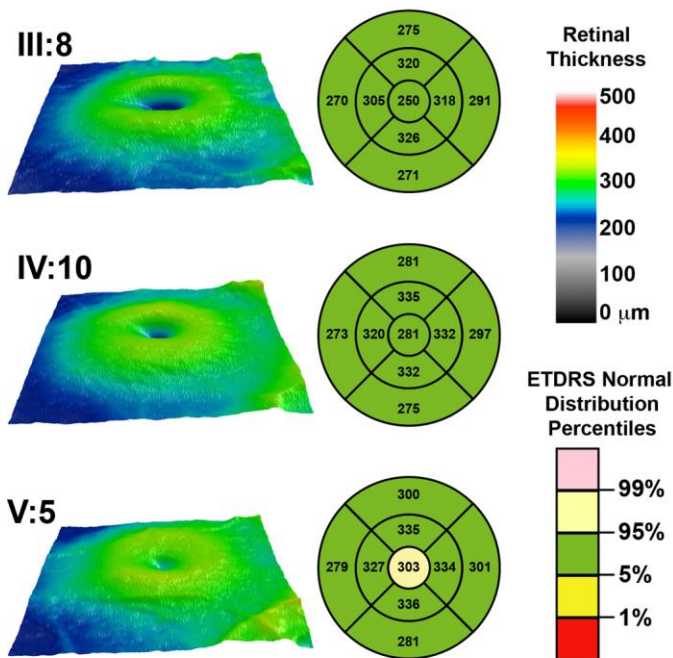

### Supplemental Figure Caption

**Supplemental Figure 1** – Topographical retinal thickness profiles, along with Early Treatment Diabetic Retinopathy (ETDRS) thickness maps for 3 of the subjects in the current study. Retinal thickness was normal in these 3 subjects, all of whom were positive for the RHO c. 133T>C; p.F45L mutation.
